# Supplementary material
Source: PubMed Central journal article supplement (PMC7011728)
Supplement: cs9b02984_si_001.pdf [file cs9b02984_si_001.pdf]

## Supporting Information

### Inverse-opal CuCrO<sub>2</sub> photocathodes for H<sub>2</sub> production using organic dyes and a molecular Ni catalyst

Charles E. Creissen,<sup>a</sup> Julien Warnan,<sup>a</sup> Daniel Antón-García,<sup>a</sup> Yoann Farré,<sup>b</sup> Fabrice Odobel,<sup>b</sup> and Erwin Reisner<sup>a\*</sup>

<sup>a</sup> Christian Doppler Laboratory for Sustainable Syngas Chemistry, Department of Chemistry, University of Cambridge, Lensfield Road, Cambridge CB2 1EW, UK

<sup>b</sup> Université LUNAM, Université de Nantes, CNRS, Chimie et Interdisciplinarité: Synthèse, Analyse, Modélisation (CEISAM), UMR 6230, 2 rue de la Houssinière, 44322 Nantes cedex 3, France

\*Corresponding author email address:  
reisner@ch.cam.ac.uk

#### Contents

|                          |             |
|--------------------------|-------------|
| Supporting Tables S1-S2  | page S2     |
| Supporting Figures S1-S6 | pages S3-S6 |
| Supporting References    | page S7     |

## Supporting Tables

**Table S1.** Dye properties determined using UV-Vis spectroscopy, fluorescence spectroscopy, and cyclic voltammetry.<sup>1-3</sup>

| Dye          | $\lambda_{\max}$ (nm) | $\epsilon$ ( $M^{-1} \text{ cm}^{-1}$ ) | $E_{00}$ (eV) | $E_{S^+/S^-}$ (V vs. RHE) | $E_{S/S^-}$ (V vs. RHE) |
|--------------|-----------------------|-----------------------------------------|---------------|---------------------------|-------------------------|
| <b>PMI-P</b> | 536                   | $3.8 \times 10^4$                       | 2.20          | 1.47                      | -0.73                   |
| <b>DPP-P</b> | 496                   | $2.6 \times 10^4$                       | 2.27          | 1.57                      | -0.70                   |

**Table S2.** Quantities of dye and catalyst loaded on the photocathodes.

| Photocathode                                               | Dye Loading ( $\text{nmol cm}^{-2}$ ) | NiP Loading ( $\text{nmol cm}^{-2}$ ) |                             |
|------------------------------------------------------------|---------------------------------------|---------------------------------------|-----------------------------|
|                                                            |                                       | Pre-catalysis                         | Post-catalysis <sup>a</sup> |
| IO-CuCrO <sub>2</sub>   <b>PMI-P/NiP</b>                   | $11.4 \pm 1.8$                        | $4.5 \pm 0.9$                         | $3.9 \pm 1.5$               |
| IO-CuCrO <sub>2</sub>   <b>DPP-P/NiP</b>                   | $14.8 \pm 1.6$                        | $4.5 \pm 0.4$                         | $3.3 \pm 1.1$               |
| Sol-Gel CuCrO <sub>2</sub>   <b>DPP-P/NiP</b> <sup>b</sup> | $2.6 \pm 0.7$                         | $0.8 \pm 0.4$                         | $0.4 \pm 0.3$               |

<sup>a</sup> Conditions for catalysis: Visible light illumination ( $100 \text{ mW cm}^{-2}$ , AM 1.5G,  $\lambda > 420 \text{ nm}$ ) for 2 h with the cell maintained at  $25 \text{ }^\circ\text{C}$ , applied potential of  $0.0 \text{ V vs. RHE}$ , aqueous  $\text{Na}_2\text{SO}_4$  ( $0.1 \text{ M}$ , pH 3). <sup>b</sup> Taken from previous report.<sup>1</sup>

## Supporting Figures

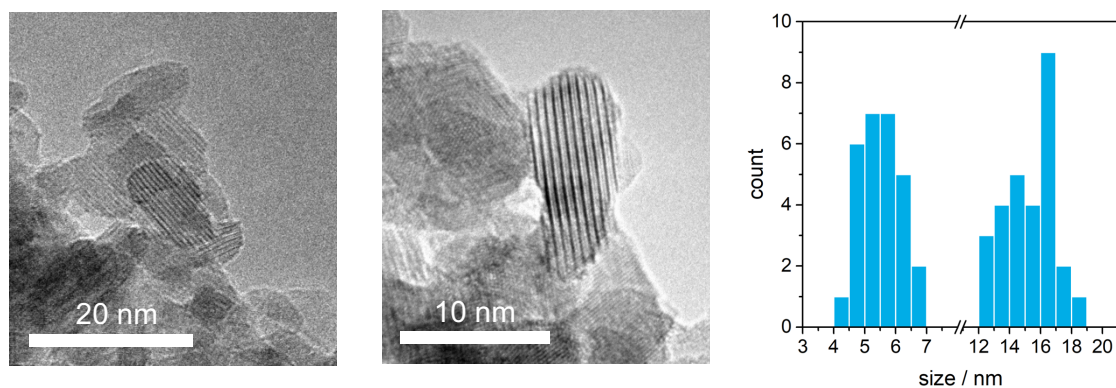

**Figure S1.** TEM images of as-prepared  $\text{CuCrO}_2$  nanoparticles with measured diameter and length distribution.

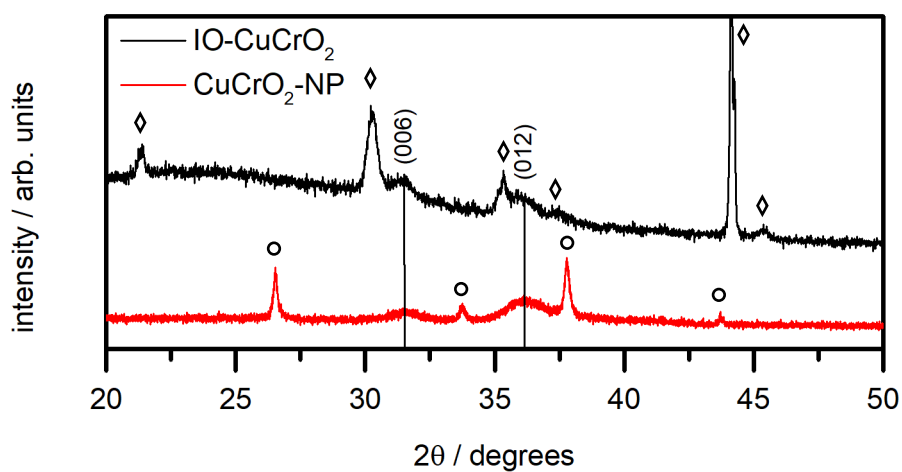

**Figure S2.** XRD patterns of  $\text{CuCrO}_2\text{-NPs}$  and  $\text{IO-CuCrO}_2$  films. Diamonds represent ITO-glass background and circles the  $\text{SiO}_2$  reference.

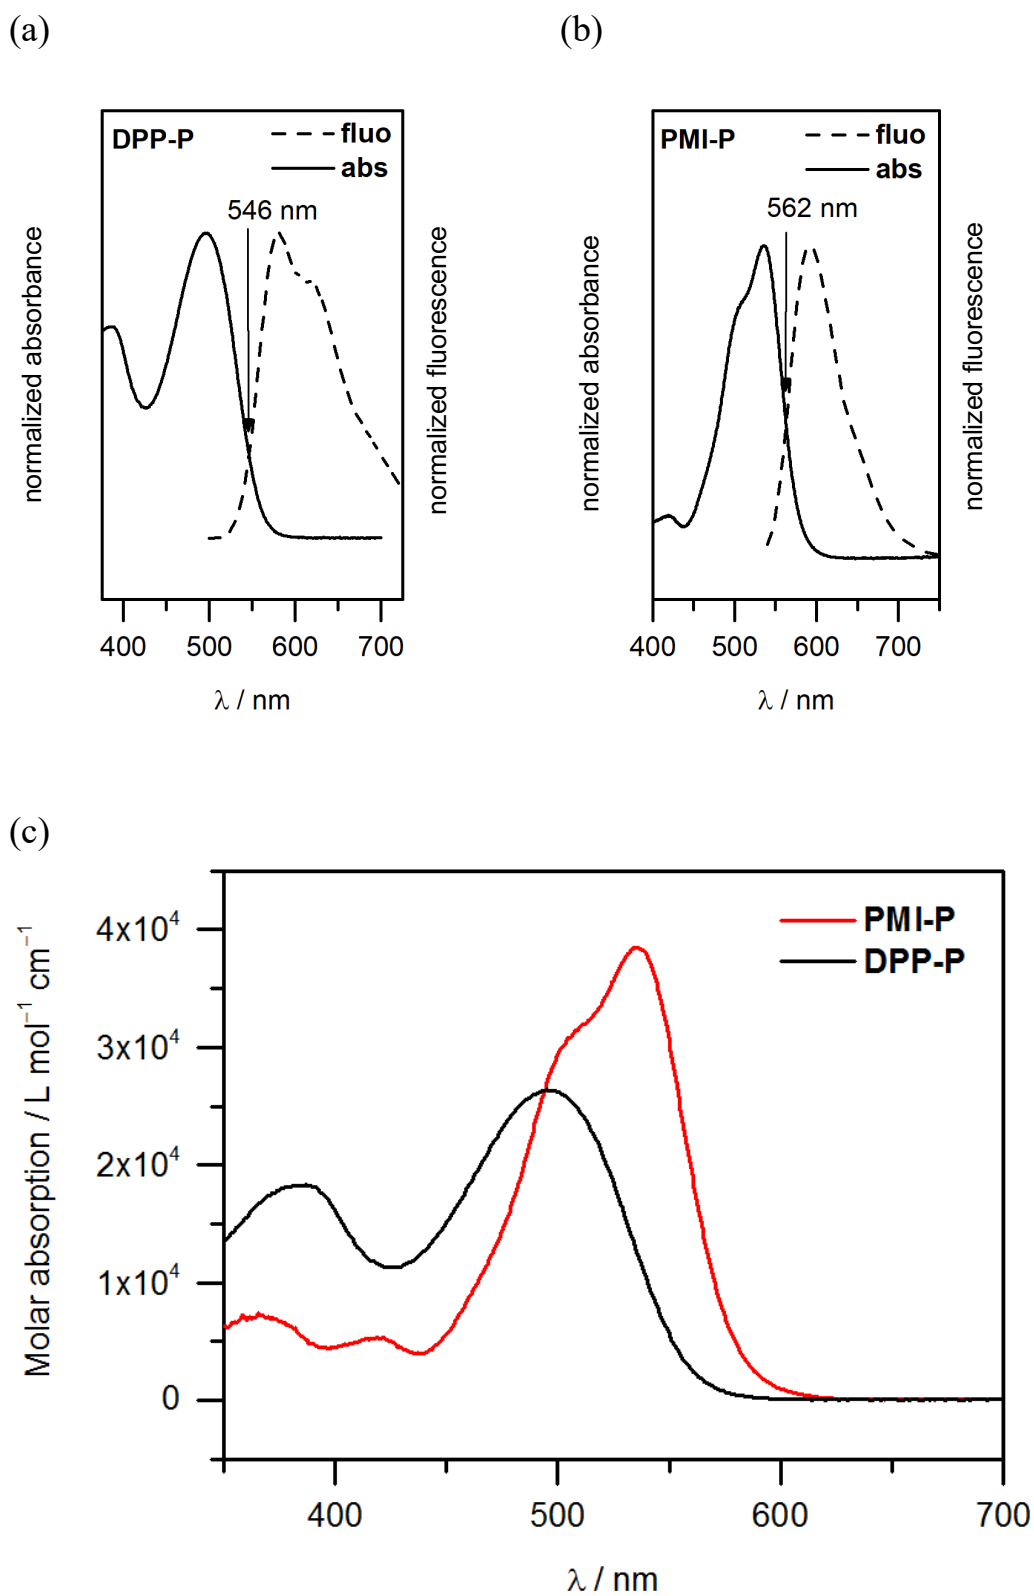

**Figure S3.** Normalized absorption and emission spectra of (a) **PMI-P** and (b) **DPP-P** in DMF, (c) UV-Vis spectra of **PMI-P** (red) and **DPP-P** (black) recorded in DMF.<sup>2,4</sup>

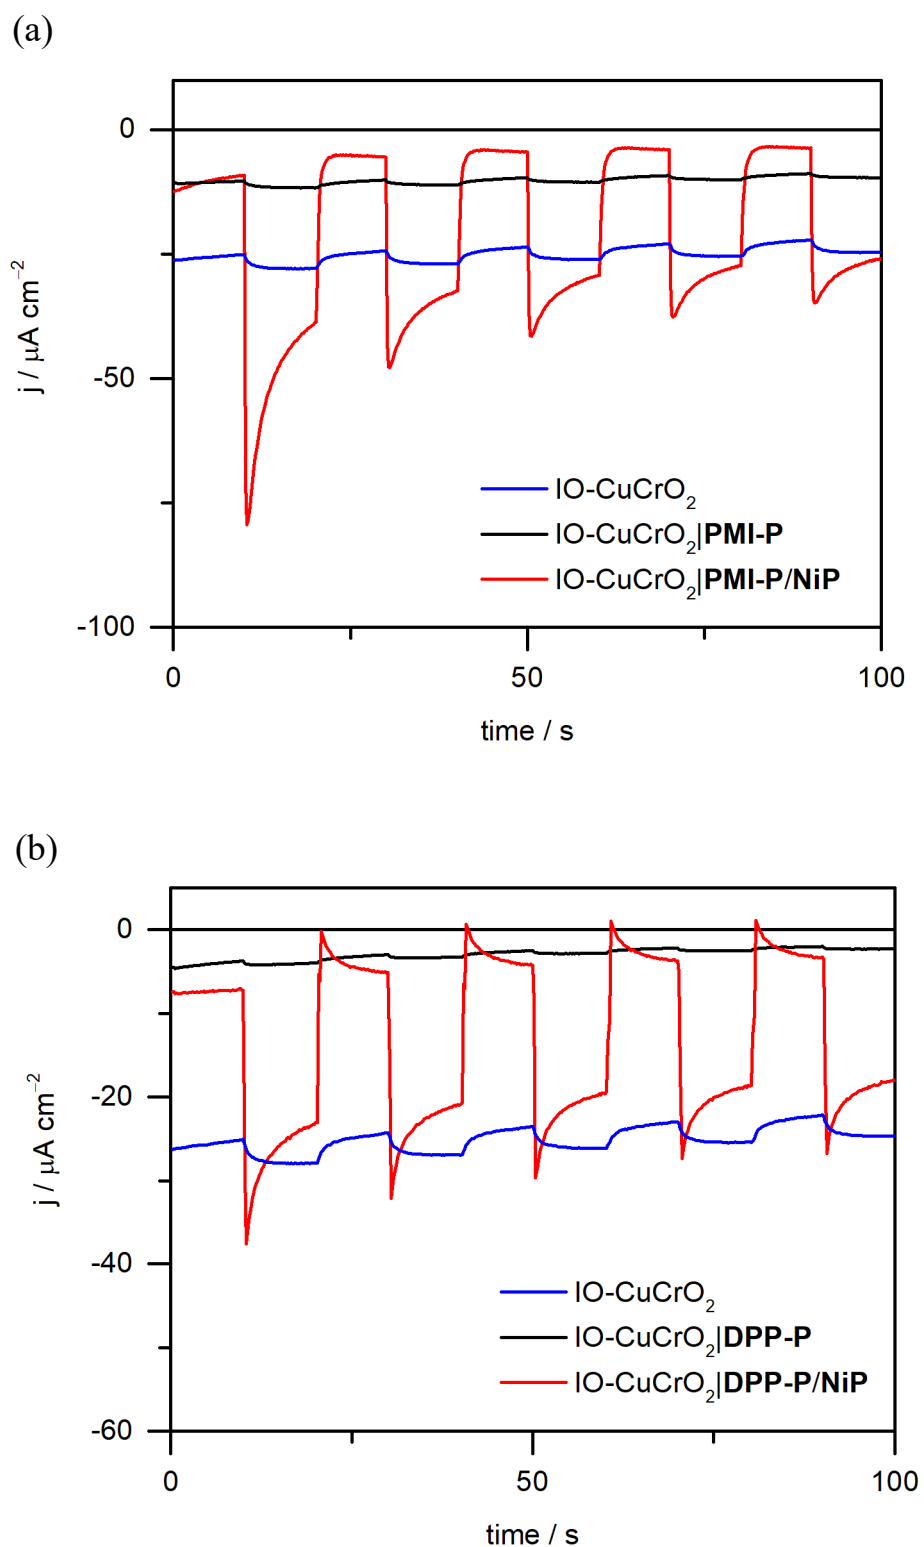

**Figure S4.** Chronoamperometry results at 0.0 V vs. RHE under chopped light illumination upon loading of separate components for (a) IO-CuCrO<sub>2</sub>|PMI-P/NiP and (b) IO-CuCrO<sub>2</sub>|DPP-P/NiP photocathodes. Conditions: aqueous Na<sub>2</sub>SO<sub>4</sub> (0.1 M, pH 3), chopped visible light illumination (100 mW cm<sup>-2</sup>, AM 1.5G, λ > 420 nm). A geometric electrode area of 0.25 cm<sup>2</sup> was used for all experiments.

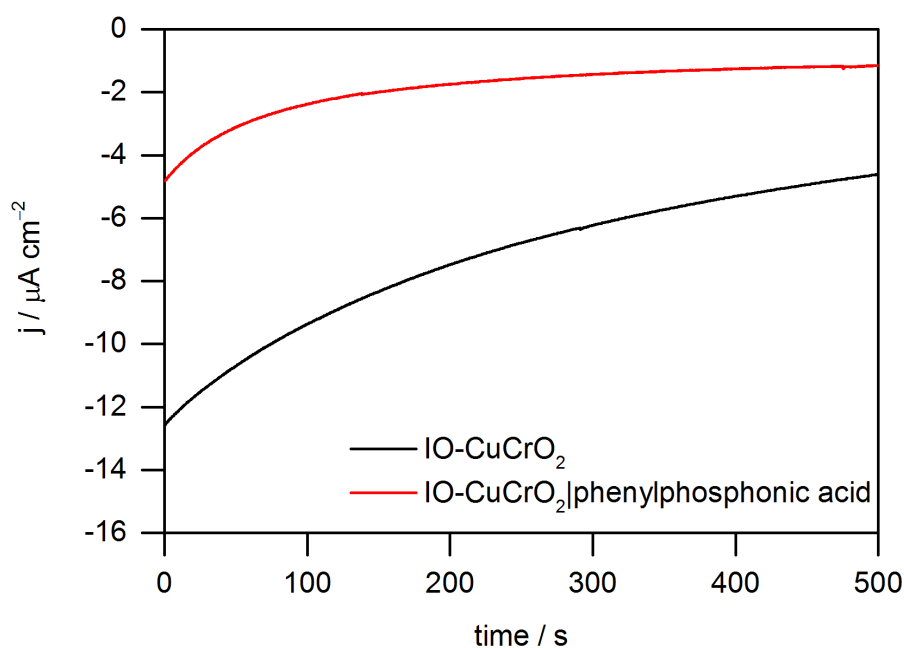

**Figure S5.** Chronoamperometry at 0.0 V vs. RHE in the dark for IO-CuCrO<sub>2</sub> and IO-CuCrO<sub>2</sub>|phenylphosphonic acid electrodes. Conditions: aqueous Na<sub>2</sub>SO<sub>4</sub> (0.1 M, pH 3). A geometric electrode area of 0.25 cm<sup>2</sup> was used.

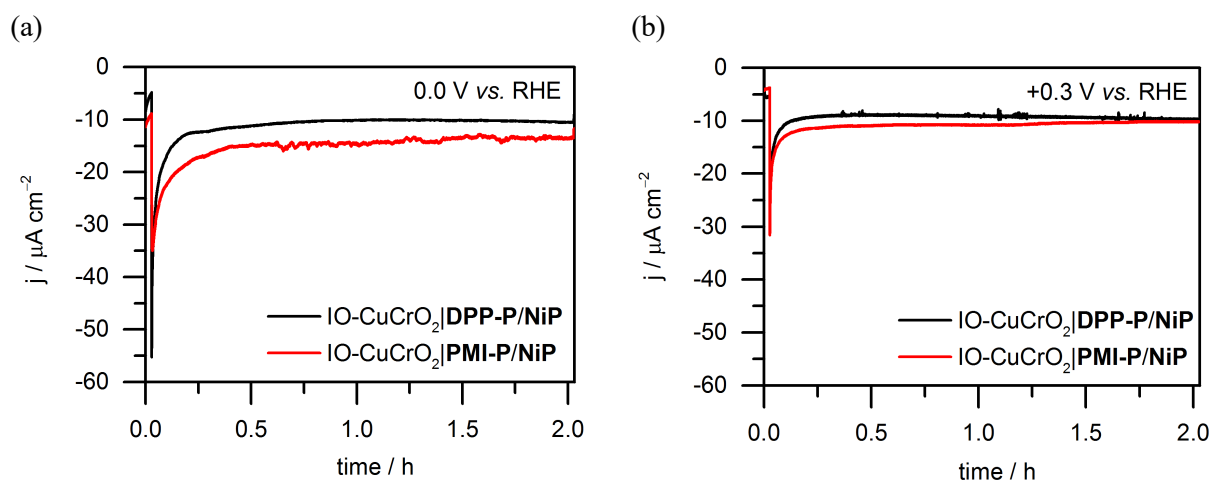

**Figure S6.** Controlled potential photoelectrolysis at (a) 0.0 V vs. RHE and (b) +0.3 V vs. RHE under constant light illumination for IO-CuCrO<sub>2</sub>|PMI-P/NiP (red) and IO-CuCrO<sub>2</sub>|DPP-P/NiP (black) photocathodes. Conditions: aqueous Na<sub>2</sub>SO<sub>4</sub> (0.1 M, pH 3), illumination (100 mW cm<sup>-2</sup>, AM 1.5G,  $\lambda > 420$  nm). A geometric electrode area of 0.25 cm<sup>2</sup> was used for all experiments.

## Supporting References

- (1) Creissen, C. E.; Warnan, J.; Reisner, E. Solar H<sub>2</sub> Generation in Water with a CuCrO<sub>2</sub> Photocathode Modified with an Organic Dye and Molecular Ni Catalyst. *Chem. Sci.* **2018**, *9*, 1439–1447.
- (2) Warnan, J.; Willkomm, J.; Farre, Y.; Pellegrin, Y.; Boujtita, M.; Odobel, F.; Reisner, E. Solar Electricity and Fuel Production with Perylene Monoimide Dye-Sensitised TiO<sub>2</sub> in Water. *Chem. Sci.* **2019**, *10*, 2758–2766.
- (3) Farré, Y.; Maschietto, F.; Föhlinger, J.; Wykes, M.; Planchat, A.; Pellegrin, Y.; Blart, E.; Ciofini, I.; Hammarström, L.; Odobel, F. Manuscript in Preparation.
- (4) Warnan, J.; Willkomm, J.; Ng, J. N.; Godin, R.; Prantl, S.; Durrant, J. R.; Reisner, E. Solar H<sub>2</sub> Evolution in Water with Modified Diketopyrrolopyrrole Dyes Immobilised on Molecular Co and Ni Catalyst–TiO<sub>2</sub> Hybrids. *Chem. Sci.* **2017**, *8*, 3070–3079.

End of Supporting Information
